# Supplementary material
Source: HighWire-hosted journal article supplement (doi:10.1101/rna.080350.124)
Supplement: Supplemental_Table_S1.xlsx [file Supplemental_Table_S1.xlsx]

## Sheet: all identified proteins
Gene name	Molecular weight (kDa)	WT LFQ mean	DIS3L-GFP LFQ mean	Peptide abundance	Peptide specificity	Protein group
Dis3l	120.28	1	276113000	6.36089	8.44109	exosome
Exosc2	32.631	1	1.78762e+08	6.73865	8.25228	exosome
Exosc4	26.249	1	154848000	6.77079	8.18991	exosome
Exosc7	31.826	1	1.38625e+08	6.63906	8.14184	exosome
Exosc6	28.37	1	73374000	6.41268	7.86554	exosome
Exosc8	29.343	1	5.93303e+07	6.30577	7.77328	exosome
Exosc9	48.936	1	5.33033e+07	6.03713	7.72675	exosome
Hbs1l	67.559	1	5.24687e+07	5.89022	7.7199	cofactor
Exosc1	21.423	1	5.16103e+07	6.38186	7.71274	exosome
Exosc5	25.194	1	4.90013e+07	6.28891	7.69021	exosome
Krt1	65.605	1	4.31173e+07	5.81771	7.63465	other
Exosc3	30.046	1	4.13183e+07	6.13836	7.61614	exosome
Krt2	70.922	1	38884000	5.73899	7.58977	other
Trypsinogen	26.42	1	3.5058e+07	6.12285	7.54479	other
Actg1	41.792	1	34387000	5.9153	7.53639	other
Try10	26.531	1	29274667	6.04274	7.46649	other
Krt17	48.161	1	2.29497e+07	5.67808	7.36078	other
Hspa8	60.801	1	1.85219e+07	5.48377	7.26768	other
Eef1a1	50.113	1	17597900	5.54551	7.24546	translation factors
Tufm	49.508	1	1.73583e+07	5.54483	7.23951	translation factors
Gigyf2	148.58	1	1.45086e+07	4.98967	7.16163	translation factors
Rpl23a	17.564	1	1.18144e+07	5.82779	7.07241	other
Rpl8	28.066	1	1.07964e+07	5.5851	7.03328	other
Rps2	25.104	1	1.07837e+07	5.63302	7.03277	other
Hbb-bs	11.083	1	9.821e+06	5.9475	6.99216	other
Krt14	52.866	1	9.407e+06	5.25027	6.97345	other
Krt77	61.301	1	7.839e+06	5.10679	6.89426	other
Rps11	15.198	1	7.3e+06	5.68154	6.86332	other
Rpl7a	30.024	1	7.20877e+06	5.38039	6.85786	other
Rps9	22.591	1	6841157	5.48119	6.83513	other
Rplp0	34.216	1	6.47117e+06	5.27675	6.81098	other
Rps20	13.373	1	6.17334e+06	5.66429	6.79052	other
Tubb4b	49.83	1	5881867	5.07202	6.76952	other
Hba	6.2159	1	5.77253e+06	5.96786	6.76137	other
Prdx1	18.87	1	5723267	5.48187	6.75764	other
Rps28	6.3442	1	5.598e+06	5.94566	6.74803	other
Krt6a	59.334	1	5574267	4.97288	6.74619	other
Tuba1c	49.909	1	5488167	5.04125	6.73943	other
Eif3a	161.93	1	5425334	4.5251	6.73443	translation factors
Eif3e	49.567	1	5365334	5.0344	6.7296	translation factors
Rpl11	20.266	1	5.26067e+06	5.41427	6.72104	other
Fn1	239.72	1	5068967	4.32522	6.70492	other
Rpl3	46.079	1	5056367	5.04034	6.70384	other
Rps12	14.515	1	4.93289e+06	5.53128	6.6931	other
Rpl31	14.411	1	4756334	5.51858	6.67727	other
Krt16;K16	51.606	1	4.756e+06	4.96454	6.67724	other
Rps5	20.413	1	4593334	5.35222	6.66213	other
Rps25	10.309	1	4.576e+06	5.64727	6.66049	other
Eif3f	16.146	1	4.391e+06	5.4345	6.64256	translation factors
NA	51.332	1	4178334	4.91061	6.621	other
Rps17	15.524	1	4.169e+06	5.42903	6.62003	other
Cps1	164.62	1	4.0371e+06	4.38959	6.60607	other
Hnrnph1	49.199	1	3.8292e+06	4.89115	6.58311	other
Rpl14	26.316	1	3.73467e+06	5.15203	6.57225	other
Rps15	13.742	1	3.60167e+06	5.41845	6.5565	other
Rpl7	31.419	1	3.351e+06	5.02798	6.52517	other
Rps16	16.445	1	3.24643e+06	5.29537	6.51141	other
Rplp2	11.651	1	3.07643e+06	5.42168	6.48805	other
Rpl27	15.798	1	2.80465e+06	5.24928	6.44788	other
Igkv6-13;Igkv6-14;Igk-V19-17	12.76	1	2.6666e+06	5.32011	6.42596	other
Rplp15	24.146	1	2347334	4.98773	6.37057	other
Rpl17	21.397	1	2.3064e+06	5.03258	6.36293	other
Hnrnpm	68.161	1	2.22853e+06	4.51448	6.34802	other
Rpl13a	20.052	1	2.19707e+06	5.03969	6.34184	other
Rpl30	12.656	1	2.146e+06	5.22933	6.33163	other
Rplp1	11.475	1	2.1359e+06	5.26983	6.32958	other
Eif3c	105.53	1	2.0049e+06	4.27872	6.30209	translation factors
Hspa5	72.422	1	1.88183e+06	4.41471	6.27458	other
Eif3h	39.846	1	1.8646e+06	4.6702	6.27059	translation factors
Rpl26	17.031	1	1.7763e+06	5.01828	6.24952	other
Ubc;Gm8797;Uba52;Gm1821;Rps27a;Kxd1;Ubb;Gm5239	8.5647	1	1.50707e+06	5.24542	6.17813	other
Eif3l	66.612	1	1.5059e+06	4.35424	6.1778	translation factors
Eif3m	42.516	1	1.4163e+06	4.5226	6.15116	translation factors
Igha	36.718	1	1.39517e+06	4.57975	6.14463	other
Rps21	8.88	1	1362734	5.186	6.13441	other
Acaa2	41.828	1	1.35897e+06	4.51174	6.13321	other
Eif3b	108.98	1	1.30237e+06	4.07739	6.11473	translation factors
Gapdh	35.812	1	1.29997e+06	4.5599	6.11393	other
Rpl5	15.996	1	1.2218e+06	4.88299	6.087	other
Cat	59.835	1	1.13292e+06	4.27724	6.0542	other
Krt42	50.133	1	976634	4.28961	5.98973	other
Tuba4a	52.793	1	960167	4.25977	5.98235	other
NA	25.616	1	919234	4.55491	5.96343	other
Rpl35a	12.573	1	916057	4.86248	5.96192	other
Mat1a	43.508	1	770734	4.24834	5.8869	other
Eif3g	35.638	1	679467	4.28026	5.83217	translation factors
Jup	81.8	1	658670	3.90591	5.81867	other
Dhx9	149.62	1	546101	3.56228	5.73727	translation factors
Dhx29	153.97	1	504934	3.5158	5.70323	translation factors
Hbb-b1	15.88	1	436134	4.43877	5.63962	other
Hsd17b4	79.423	1	427434	3.73092	5.63087	other
Rpl12	17.806	1	407834	4.35992	5.61048	other
Eef2	28.657	1	330424	4.06184	5.51907	translation factors
Fga	61.325	1	291067	3.67636	5.46399	other
Hnrnpf	43.685	1	212931	3.68791	5.32824	other
Hnrnpd	12.139	1	136461	4.05082	5.13501	other
Hsp90ab1	8.7157	1	94847.3	4.03672	4.97703	other
Serpinf2	54.971	1	41337.3	2.87621	4.61634	other
Rps18;Gm10260	12.483	1060000	20372010	6.21271	1.28373	other
Rpl13	24.305	1063300	9.71915e+06	5.60193	0.960973	other
Krt5	61.766	23550000	1.5782e+08	6.40741	0.826172	other
Krt78	47.618	5898500	34629100	5.86167	0.7687	other
Tubb5;Tubb2b;Tubb2a	49.67	3218200	1.7831e+07	5.55508	0.743563	other
Rps6	28.667	2200300	12136630	5.62672	0.741616	other
Rps8	24.263	2258100	9.48349e+06	5.59202	0.623225	other
rps14;Rps14	16.301	3273300	1.31793e+07	5.90768	0.604906	other
Rps3a1;Rps3a	29.885	5223400	16128280	5.73213	0.489635	other
Krt10	57.04	14390000	3.91843e+07	5.83693	0.435052	other
Rpl10;Rpl10l	23.072	3875900	6505860	5.45022	0.224932	other
Rps19	16.661	22524000	25458040	6.18412	0.0531794	other
Rps10	18.371	6602500	7.1014e+06	5.58721	0.0316354	other
Rpsa	32.85	15964000	16623334	5.70418	0.0175764	other
Rps3	26.64	11467000	1.18009e+07	5.64638	0.0124665	other
Actb	41.768	1	1	-1.62084	0	other
Tuba3a	49.959	1	1	-1.69861	0	other
Nudcd2	17.66	1	1	-1.24699	0	other
NA	10.662	1	1	-1.02784	0	other
Rpl22	14.759	1	1	-1.16906	0	other
Nudt21	20.954	1	1	-1.32127	0	other
Igkv8-28;Igkv8-19;scFv B8E5	10.903	1	1	-1.03755	0	other
Prss1	26.134	1	1	-1.41721	0	other
Snrpd3	13.985	1	1	-1.14566	0	other
Krt15	49.493	1	1	-1.69454	0	other
4732456N10Rik;Krt7	58.266	1	1	-1.76542	0	other
Hspa1b;Hspa1a	70.078	1	1	-1.84558	0	other
2210010C04Rik	26.407	1	1	-1.42172	0	other
Rpl19	23.247	1	1	-1.36637	0	other
Atp5a1	54.594	1	1	-1.73714	0	other
Rbm39	33.828	1	1	-1.52928	0	other
Pdha2	43.425	1	1	-1.63774	0	other
Ddx17;Ddx5	47.385	1	1	-1.67564	0	other
p16;Rbm14	58.734	1	1	-1.76889	0	other
Fam46c	44.796	1	1	-1.65124	0	other
Dsp	332.91	1	1	-2.52233	0	other
Eif4e2	25.919	1	1	-1.41362	0	other
Exosc10	71.037	1	1	-1.85148	0	other
Khsrp	76.775	1	1	-1.88522	0	other
Mbp	20.829	1	1	-1.31867	0	other
Flna	27.675	1	1	-1.44209	0	other
Srsf3;Gm12355	14.203	1	1	-1.15238	0	other
Anxa2	19.596	1	1	-1.29217	0	other
Hnrnpa2b1	35.964	1	1	-1.55587	0	other
Ppia	17.047	1	1	-1.23165	0	other
Luc7l2;Luc7l	45.404	1	1	-1.65709	0	other
Vim	49.192	1	1	-1.69189	0	other
Hspb1	9.4115	1	1	-0.973659	0	other
Hist1h1c;Hist1h1d;Hist1h1a;Hist1h1e	21.266	1	1	-1.32769	0	other
Fau;fau	14.416	1	1	-1.15884	0	other
Pkp1	80.895	1	1	-1.90792	0	other
Ighv1-42;Ighv1-31;Ighv1-18;Ighv1-37;Ighv1-34;Ighv1-26;Ighv1-22;Igh;Igh-VJ558	10.776	1	1	-1.03246	0	other
Snrpd1	13.281	1	1	-1.12323	0	other
Tpi1	17.997	1	1	-1.2552	0	other
Gm9493;Rps7	21.882	10796000	8.024e+06	5.5643	-0.128872	other
Snrpa1	28.357	35059000	2.55166e+07	5.95416	-0.137976	other
Gnb2l1	35.076	7226800	5219900	5.17265	-0.141284	other
Serbp1	39.644	5407500	3548334	4.95185	-0.182972	other
Rps13	17.222	13494000	7470167	5.63725	-0.25681	other
Rpl28	15.709	10457000	5.73167e+06	5.56213	-0.261126	other
Rps23	15.835	6760500	3.26521e+06	5.31429	-0.316067	other
Rpl18	15.245	8620600	3929334	5.41119	-0.341219	other
Rps24	15.325	6367000	2.88627e+06	5.27494	-0.343598	other
Rpl6	33.509	6438300	2.91507e+06	4.93949	-0.344123	other
Rps4x;Rps4l;Gm15013	27.504	14196000	5.62267e+06	5.31055	-0.402224	other
Ighm	49.943	22023000	7.30953e+06	5.16542	-0.478987	other
Rpl4	47.153	7558000	2462134	4.7178	-0.487095	other
Rpl21	18.579	3780800	1.0325e+06	4.74487	-0.563693	other
Rps26	13.015	3631300	604167	4.66671	-0.778905	other
Rpl36	12.254	3089600	348001	4.4533	-0.948322	other
G8(anti-MRBC) V-2/ J-L;Igk	8.9447	2923800	1	-0.951566	-6.46595	other
Rpl38	8.2038	3739900	1	-0.914015	-6.57286	other
Rpl23	14.865	3768200	1	-1.17216	-6.57613	other
Rpl10a	24.831	7170200	1	-1.39499	-6.85553	other
Gm17669;Rpl29;Gm5218;Gm3550	16.966	13014000	1	-1.22958	-7.11441	other

## Sheet: enriched proteins
Gene names	Molecular weight (kDa)	WT LFQ mean	DIS3L-GFP LFQ mean	Peptide abundance	Peptide specificity	Protein group
Dis3l	120.28	1	276113000	6.36089	8.44109	exosome
Exosc2	32.631	1	1.78762e+08	6.73865	8.25228	exosome
Exosc4	26.249	1	154848000	6.77079	8.18991	exosome
Exosc7	31.826	1	1.38625e+08	6.63906	8.14184	exosome
Exosc6	28.37	1	73374000	6.41268	7.86554	exosome
Exosc8	29.343	1	5.93303e+07	6.30577	7.77328	exosome
Exosc9	48.936	1	5.33033e+07	6.03713	7.72675	exosome
Hbs1l	67.559	1	5.24687e+07	5.89022	7.7199	cofactor
Exosc1	21.423	1	5.16103e+07	6.38186	7.71274	exosome
Exosc5	25.194	1	4.90013e+07	6.28891	7.69021	exosome
Krt1	65.605	1	4.31173e+07	5.81771	7.63465	other
Exosc3	30.046	1	4.13183e+07	6.13836	7.61614	exosome
Krt2	70.922	1	38884000	5.73899	7.58977	other
Trypsinogen	26.42	1	3.5058e+07	6.12285	7.54479	other
Actg1	41.792	1	34387000	5.9153	7.53639	other
Try10	26.531	1	29274667	6.04274	7.46649	other
Krt17	48.161	1	2.29497e+07	5.67808	7.36078	other
Hspa8	60.801	1	1.85219e+07	5.48377	7.26768	other
Eef1a1	50.113	1	17597900	5.54551	7.24546	other
Tufm	49.508	1	1.73583e+07	5.54483	7.23951	other
Gigyf2	148.58	1	1.45086e+07	4.98967	7.16163	other
Rpl23a	17.564	1	1.18144e+07	5.82779	7.07241	other
Rpl8	28.066	1	1.07964e+07	5.5851	7.03328	other
Rps2	25.104	1	1.07837e+07	5.63302	7.03277	other
Hbb-bs	11.083	1	9.821e+06	5.9475	6.99216	other
Krt14	52.866	1	9.407e+06	5.25027	6.97345	other
Krt77	61.301	1	7.839e+06	5.10679	6.89426	other
Rps11	15.198	1	7.3e+06	5.68154	6.86332	other
Rpl7a	30.024	1	7.20877e+06	5.38039	6.85786	other
Rps9	22.591	1	6841157	5.48119	6.83513	other
Rplp0	34.216	1	6.47117e+06	5.27675	6.81098	other
Rps20	13.373	1	6.17334e+06	5.66429	6.79052	other
Tubb4b	49.83	1	5881867	5.07202	6.76952	other
Hba	6.2159	1	5.77253e+06	5.96786	6.76137	other
Prdx1	18.87	1	5723267	5.48187	6.75764	other
Rps28	6.3442	1	5.598e+06	5.94566	6.74803	other
Krt6a	59.334	1	5574267	4.97288	6.74619	other
Tuba1c	49.909	1	5488167	5.04125	6.73943	other
Eif3a	161.93	1	5425334	4.5251	6.73443	eif
Eif3e	49.567	1	5365334	5.0344	6.7296	eif
Rpl11	20.266	1	5.26067e+06	5.41427	6.72104	other
Fn1	239.72	1	5068967	4.32522	6.70492	other
Rpl3	46.079	1	5056367	5.04034	6.70384	other
Rps12	14.515	1	4.93289e+06	5.53128	6.6931	other
Rpl31	14.411	1	4756334	5.51858	6.67727	other
Krt16;K16	51.606	1	4.756e+06	4.96454	6.67724	other
Rps5	20.413	1	4593334	5.35222	6.66213	other
Rps25	10.309	1	4.576e+06	5.64727	6.66049	other
Eif3f	16.146	1	4.391e+06	5.4345	6.64256	eif
NA	51.332	1	4178334	4.91061	6.621	other
Rps17	15.524	1	4.169e+06	5.42903	6.62003	other
Cps1	164.62	1	4.0371e+06	4.38959	6.60607	other
Hnrnph1	49.199	1	3.8292e+06	4.89115	6.58311	other
Rpl14	26.316	1	3.73467e+06	5.15203	6.57225	other
Rps15	13.742	1	3.60167e+06	5.41845	6.5565	other
Rpl7	31.419	1	3.351e+06	5.02798	6.52517	other
Rps16	16.445	1	3.24643e+06	5.29537	6.51141	other
Rplp2	11.651	1	3.07643e+06	5.42168	6.48805	other
Rpl27	15.798	1	2.80465e+06	5.24928	6.44788	other
Igkv6-17	12.76	1	2.6666e+06	5.32011	6.42596	other
Rplp15	24.146	1	2347334	4.98773	6.37057	other
Rpl17	21.397	1	2.3064e+06	5.03258	6.36293	other
Hnrnpm	68.161	1	2.22853e+06	4.51448	6.34802	other
Rpl13a	20.052	1	2.19707e+06	5.03969	6.34184	other
Rpl30	12.656	1	2.146e+06	5.22933	6.33163	other
Rplp1	11.475	1	2.1359e+06	5.26983	6.32958	other
Eif3c	105.53	1	2.0049e+06	4.27872	6.30209	eif
Hspa5	72.422	1	1.88183e+06	4.41471	6.27458	other
Eif3h	39.846	1	1.8646e+06	4.6702	6.27059	eif
Rpl26	17.031	1	1.7763e+06	5.01828	6.24952	other
Ubc	8.5647	1	1.50707e+06	5.24542	6.17813	other
Eif3l	66.612	1	1.5059e+06	4.35424	6.1778	eif
Eif3m	42.516	1	1.4163e+06	4.5226	6.15116	eif
Igha	36.718	1	1.39517e+06	4.57975	6.14463	other
Rps21	8.88	1	1362734	5.186	6.13441	other
Acaa2	41.828	1	1.35897e+06	4.51174	6.13321	other
Eif3b	108.98	1	1.30237e+06	4.07739	6.11473	eif
Gapdh	35.812	1	1.29997e+06	4.5599	6.11393	other
Rpl5	15.996	1	1.2218e+06	4.88299	6.087	other
Cat	59.835	1	1.13292e+06	4.27724	6.0542	other
Krt42	50.133	1	976634	4.28961	5.98973	other
Tuba4a	52.793	1	960167	4.25977	5.98235	other
NA	25.616	1	919234	4.55491	5.96343	other
Rpl35a	12.573	1	916057	4.86248	5.96192	other
Mat1a	43.508	1	770734	4.24834	5.8869	other
Eif3g	35.638	1	679467	4.28026	5.83217	eif
Jup	81.8	1	658670	3.90591	5.81867	other
Dhx9	149.62	1	546101	3.56228	5.73727	other
Dhx29	153.97	1	504934	3.5158	5.70323	other
Hbb-b1	15.88	1	436134	4.43877	5.63962	other
Hsd17b4	79.423	1	427434	3.73092	5.63087	other
Rpl12	17.806	1	407834	4.35992	5.61048	other
Eef2	28.657	1	330424	4.06184	5.51907	other
Fga	61.325	1	291067	3.67636	5.46399	other
Hnrnpf	43.685	1	212931	3.68791	5.32824	other
Hnrnpd	12.139	1	136461	4.05082	5.13501	other
Hsp90ab1	8.7157	1	94847.3	4.03672	4.97703	other
Serpinf2	54.971	1	41337.3	2.87621	4.61634	other

## Sheet: enriched proteins - filtered
Gene names	Molecular weight (kDa)	WT LFQ mean	DIS3L-GFP LFQ mean	Peptide abundance	Peptide specificity	Protein group
Dis3l	120.28	1	276113000	6.36089	8.44109	exosome
Exosc2	32.631	1	1.78762e+08	6.73865	8.25228	exosome
Exosc4	26.249	1	154848000	6.77079	8.18991	exosome
Exosc7	31.826	1	1.38625e+08	6.63906	8.14184	exosome
Exosc6	28.37	1	73374000	6.41268	7.86554	exosome
Exosc8	29.343	1	5.93303e+07	6.30577	7.77328	exosome
Exosc9	48.936	1	5.33033e+07	6.03713	7.72675	exosome
Hbs1l	67.559	1	5.24687e+07	5.89022	7.7199	cofactor
Exosc1	21.423	1	5.16103e+07	6.38186	7.71274	exosome
Exosc5	25.194	1	4.90013e+07	6.28891	7.69021	exosome
Exosc3	30.046	1	4.13183e+07	6.13836	7.61614	exosome
Actg1	41.792	1	34387000	5.9153	7.53639	other
Hspa8	60.801	1	1.85219e+07	5.48377	7.26768	other
Eef1a1	50.113	1	17597900	5.54551	7.24546	translation factors
Tufm	49.508	1	1.73583e+07	5.54483	7.23951	translation factors
Gigyf2	148.58	1	1.45086e+07	4.98967	7.16163	translation factors
Rpl23a	17.564	1	1.18144e+07	5.82779	7.07241	other
Rpl8	28.066	1	1.07964e+07	5.5851	7.03328	other
Rps2	25.104	1	1.07837e+07	5.63302	7.03277	other
Rps11	15.198	1	7.3e+06	5.68154	6.86332	other
Rpl7a	30.024	1	7.20877e+06	5.38039	6.85786	other
Rps9	22.591	1	6841157	5.48119	6.83513	other
Rplp0	34.216	1	6.47117e+06	5.27675	6.81098	other
Rps20	13.373	1	6.17334e+06	5.66429	6.79052	other
Tubb4b	49.83	1	5881867	5.07202	6.76952	other
Prdx1	18.87	1	5723267	5.48187	6.75764	other
Rps28	6.3442	1	5.598e+06	5.94566	6.74803	other
Tuba1c	49.909	1	5488167	5.04125	6.73943	other
Eif3a	161.93	1	5425334	4.5251	6.73443	translation factors
Eif3e	49.567	1	5365334	5.0344	6.7296	translation factors
Rpl11	20.266	1	5.26067e+06	5.41427	6.72104	other
Fn1	239.72	1	5068967	4.32522	6.70492	other
Rpl3	46.079	1	5056367	5.04034	6.70384	other
Rps12	14.515	1	4.93289e+06	5.53128	6.6931	other
Rpl31	14.411	1	4756334	5.51858	6.67727	other
Rps5	20.413	1	4593334	5.35222	6.66213	other
Rps25	10.309	1	4.576e+06	5.64727	6.66049	other
Eif3f	16.146	1	4.391e+06	5.4345	6.64256	translation factors
Rps17	15.524	1	4.169e+06	5.42903	6.62003	other
Cps1	164.62	1	4.0371e+06	4.38959	6.60607	other
Hnrnph1	49.199	1	3.8292e+06	4.89115	6.58311	other
Rpl14	26.316	1	3.73467e+06	5.15203	6.57225	other
Rps15	13.742	1	3.60167e+06	5.41845	6.5565	other
Rpl7	31.419	1	3.351e+06	5.02798	6.52517	other
Rps16	16.445	1	3.24643e+06	5.29537	6.51141	other
Rplp2	11.651	1	3.07643e+06	5.42168	6.48805	other
Rpl27	15.798	1	2.80465e+06	5.24928	6.44788	other
Rplp15	24.146	1	2347334	4.98773	6.37057	other
Rpl17	21.397	1	2.3064e+06	5.03258	6.36293	other
Hnrnpm	68.161	1	2.22853e+06	4.51448	6.34802	other
Rpl13a	20.052	1	2.19707e+06	5.03969	6.34184	other
Rpl30	12.656	1	2.146e+06	5.22933	6.33163	other
Rplp1	11.475	1	2.1359e+06	5.26983	6.32958	other
Eif3c	105.53	1	2.0049e+06	4.27872	6.30209	translation factors
Hspa5	72.422	1	1.88183e+06	4.41471	6.27458	other
Eif3h	39.846	1	1.8646e+06	4.6702	6.27059	translation factors
Rpl26	17.031	1	1.7763e+06	5.01828	6.24952	other
Ubc	8.5647	1	1.50707e+06	5.24542	6.17813	other
Eif3l	66.612	1	1.5059e+06	4.35424	6.1778	translation factors
Eif3m	42.516	1	1.4163e+06	4.5226	6.15116	translation factors
Rps21	8.88	1	1362734	5.186	6.13441	other
Acaa2	41.828	1	1.35897e+06	4.51174	6.13321	other
Eif3b	108.98	1	1.30237e+06	4.07739	6.11473	translation factors
Gapdh	35.812	1	1.29997e+06	4.5599	6.11393	other
Rpl5	15.996	1	1.2218e+06	4.88299	6.087	other
Cat	59.835	1	1.13292e+06	4.27724	6.0542	other
Tuba4a	52.793	1	960167	4.25977	5.98235	other
NA	25.616	1	919234	4.55491	5.96343	other
Rpl35a	12.573	1	916057	4.86248	5.96192	other
Mat1a	43.508	1	770734	4.24834	5.8869	other
Eif3g	35.638	1	679467	4.28026	5.83217	translation factors
Jup	81.8	1	658670	3.90591	5.81867	other
Dhx9	149.62	1	546101	3.56228	5.73727	translation factors
Dhx29	153.97	1	504934	3.5158	5.70323	translation factors
Hsd17b4	79.423	1	427434	3.73092	5.63087	other
Rpl12	17.806	1	407834	4.35992	5.61048	other
Eef2	28.657	1	330424	4.06184	5.51907	translation factors
Fga	61.325	1	291067	3.67636	5.46399	other
Hnrnpf	43.685	1	212931	3.68791	5.32824	other
Hnrnpd	12.139	1	136461	4.05082	5.13501	other
Hsp90ab1	8.7157	1	94847.3	4.03672	4.97703	other
Serpinf2	54.971	1	41337.3	2.87621	4.61634	other
